# Supplementary material for: Lysogeny with Shiga Toxin 2-Encoding Bacteriophages Represses Type III Secretion in Enterohemorrhagic Escherichia coli
Source: PubMed Central journal article supplement (PMC3355084; doi:10.1371/journal.ppat.1002672), 2012-05-17
Supplement: ppat.1002672.s003.pdf [file ppat.1002672.s003.pdf]

**Table S1.** EHEC O157:H7 PT21/28 and PT32 strains and properties

| Source <sup>1</sup> | Original isolate Code <sup>1</sup> | Year isolated | Phage Type <sup>2</sup> | Fecal count (CFU) <sup>2</sup> | Super-shedder >1000 CFU | LEE1-GFP (RFU) <sup>3</sup> | stx1 | stx2 | stx2c |
|---------------------|------------------------------------|---------------|-------------------------|--------------------------------|-------------------------|-----------------------------|------|------|-------|
| Bovine              | WX006972S01E                       | 2002          | 21/28                   | <100                           | no                      | 7692                        | -    | +    | +     |
| Bovine              | WX011805S01E                       | 2002          | 21/28                   | <100                           | no                      | 11923                       | -    | +    | +     |
| Bovine              | WX014281S01E                       | 2003          | 21/28                   | <100                           | no                      | 12692                       | -    | +    | +     |
| Bovine              | WX015602S01E                       | 2003          | 21/28                   | <100                           | no                      | 15000                       | -    | +    | +     |
| Bovine              | WX017480S01E                       | 2003          | 21/28                   | <100                           | no                      | 3078                        | -    | +    | +     |
| Bovine              | WX017845S01E                       | 2003          | 21/28                   | 300000                         | yes                     | 5000                        | -    | +    | +     |
| Bovine              | WX009000S01E                       | 2002          | 21/28                   | 686400                         | yes                     | 6154                        | -    | +    | +     |
| Bovine              | WX017849S01E                       | 2003          | 21/28                   | 150000                         | yes                     | 10769                       | -    | +    | +     |
| Bovine              | WX011806S01E                       | 2002          | 21/28                   | 384000                         | yes                     | 12692                       | -    | +    | +     |
| Bovine              | WX008997S01E                       | 2002          | 21/28                   | 269200                         | yes                     | 12692                       | -    | +    | +     |
| Bovine              | WX017489S01E                       | 2003          | 21/28                   | 77600                          | yes                     | 24615                       | -    | +    | +     |
| Bovine              | WX017706S01E                       | 2003          | 21/28                   | 16100                          | yes                     | NT                          | -    | +    | +     |
| Bovine              | WX017504S01E                       | 2003          | 21/28                   | 59300                          | yes                     | 5385                        | -    | +    | +     |
| Bovine              | WX017704S01E                       | 2003          | 21/28                   | 11500                          | yes                     | NT                          | -    | +    | +     |
| Bovine              | WX011820S01E                       | 2002          | 21/28                   | 42400                          | yes                     | 10385                       | -    | +    | +     |
| Bovine              | WX017850S01E                       | 2003          | 21/28                   | 150000                         | yes                     | NT                          | -    | +    | -     |
| Bovine              | WX017478S01E                       | 2003          | 21/28                   | 46000                          | yes                     | NT                          | -    | +    | +     |
| Bovine              | WX008998S01E                       | 2002          | 21/28                   | 21000                          | yes                     | NT                          | -    | +    | +     |
| Bovine              | WX016438S01E                       | 2003          | 32                      | 36150000                       | yes                     | 28461                       | -    | +    | +     |
| Bovine              | WX007666S01E                       | 2002          | 32                      | NK                             | NK                      | 20000                       | -    | -    | +     |
| Bovine              | WX007784S01E                       | 2002          | 32                      | <100                           | no                      | 20385                       | -    | -    | +     |
| Bovine              | WX007902S01E                       | 2002          | 32                      | <100                           | no                      | 18846                       | -    | -    | +     |
| Bovine              | WX008309S01E                       | 2002          | 32                      | <100                           | no                      | 16923                       | -    | -    | +     |
| Bovine              | WX008801S01E                       | 2002          | 32                      | <100                           | no                      | 16923                       | -    | +    | -     |
| Bovine              | WX009006S01E                       | 2002          | 32                      | 900                            | no                      | NT                          | -    | -    | +     |
| Bovine              | WX009064S01E                       | 2002          | 32                      | <100                           | no                      | 14231                       | -    | -    | +     |
| Bovine              | WX009807S01E                       | 2002          | 32                      | <100                           | no                      | 12692                       | -    | -    | +     |
| Bovine              | WX010671S01E                       | 2002          | 32                      | <100                           | no                      | 21538                       | -    | -    | +     |
| Bovine              | WX010693S01E                       | 2002          | 32                      | <100                           | no                      | NT                          | -    | -    | +     |
| Bovine              | WX011204S01E                       | 2002          | 32                      | <100                           | no                      | 19230                       | -    | -    | +     |
| Bovine              | WX014079S01E                       | 2003          | 32                      | <100                           | no                      | NT                          | -    | +    | +     |
| Bovine              | WX015000S01E                       | 2003          | 32                      | 119600                         | yes                     | 28845                       | -    | +    | +     |
| Bovine              | WX015289S01E                       | 2003          | 32                      | <100                           | no                      | 13078                       | -    | -    | +     |
| Bovine              | WX017001S01E                       | 2003          | 32                      | <100                           | no                      | NT                          | -    | -    | +     |

| Bovine              | WX017482S01E                       | 2003          | 32         | <100              | no                      | NT                          | -    | +    | +     |
|---------------------|------------------------------------|---------------|------------|-------------------|-------------------------|-----------------------------|------|------|-------|
| Bovine              | WX017742S01E                       | 2003          | 32         | <100              | no                      | 13846                       | -    | -    | +     |
| Bovine              | WX018755S01E                       | 2003          | 32         | <100              | no                      | 11923                       | -    | -    | +     |
| Bovine              | WX020206S01E                       | 2004          | 32         | <100              | no                      | 13846                       | -    | -    | +     |
| Source <sup>4</sup> | Original isolate code <sup>4</sup> | Year isolated | Phage Type | Fecal count (CFU) | Super-shedder >1000 CFU | LEE1-GFP (RFU) <sup>3</sup> | stx1 | stx2 | stx2c |
| Human               | 16370                              | 2008          | 21/28      | -                 | NA                      | 13461                       | -    | +    | +     |
| Human               | 16308                              | 2008          | 21/28      | -                 | NA                      | NT                          | -    | +    | +     |
| Human               | <u>16117</u>                       | 2008          | 21/28      | -                 | NA                      | NT                          | -    | +    | +     |
| Human               | 16000                              | 2008          | 21/28      | -                 | NA                      | NT                          | -    | +    | -     |
| Human               | 15919                              | 2008          | 21/28      | -                 | NA                      | NT                          | -    | +    | +     |
| Human               | 15827                              | 2008          | 21/28      | -                 | NA                      | NT                          | -    | +    | -     |
| Human               | 16347                              | 2008          | 21/28      | -                 | NA                      | NT                          | -    | +    | +     |
| Human               | 16299                              | 2008          | 21/28      | -                 | NA                      | NT                          | -    | +    | +     |
| Human               | 16094                              | 2008          | 21/28      | -                 | NA                      | NT                          | -    | +    | +     |
| Human               | 15999                              | 2008          | 21/28      | -                 | NA                      | NT                          | -    | +    | +     |
| Human               | 15960                              | 2008          | 21/28      | -                 | NA                      | NT                          | -    | +    | +     |
| Human               | 15883                              | 2008          | 21/28      | -                 | NA                      | NT                          | -    | +    | +     |
| Human               | 16161                              | 2008          | 32         | -                 | NA                      | 36155                       | -    | +    | -     |
| Human               | 15570                              | 2008          | 32         | -                 | NA                      | 20385                       | +    | -    | +     |
| Human               | <u>13425</u>                       | 2007          | 32         | -                 | NA                      | NT                          | -    | -    | +     |
| Human               | 13024                              | 2007          | 32         | -                 | NA                      | NT                          | -    | +    | +     |
| Human               | 12607                              | 2007          | 32         | -                 | NA                      | NT                          | -    | +    | -     |
| Human               | 12414                              | 2007          | 32         | -                 | NA                      | NT                          | -    | +    | +     |
| Human               | 12443                              | 2007          | 32         | -                 | NA                      | NT                          | -    | +    | +     |
| Human               | 16512                              | 2008          | 32         | -                 | NA                      | NT                          | -    | +    | -     |
| Human               | 15780                              | 2008          | 32         | -                 | NA                      | NT                          | -    | +    | +     |
| Human               | 14052                              | 2008          | 32         | -                 | NA                      | NT                          | -    | -    | +     |
| Human               | 13493                              | 2007          | 32         | -                 | NA                      | NT                          | -    | +    | +     |
| Human               | 12730                              | 2007          | 32         | -                 | NA                      | NT                          | -    | +    | -     |

1. All bovine isolates were from farms in Scotland as described previously [42]. Numbers underlined are the abbreviated designation used to define the isolates when referred to in the manuscript.
2. The phage type and faecal count were determined as described previously [42].
3. LEE1-GFP expression was determined as described in Material and Methods. NT – not tested; NA – not applicable; NK – not known.
4. All human cases were from patient samples collected in Scotland and analysed by the Scottish *E. coli* reference laboratory (SERL).
