# Supplementary material for: Lysogeny with Shiga Toxin 2-Encoding Bacteriophages Represses Type III Secretion in Enterohemorrhagic Escherichia coli
Source: PubMed Central journal article supplement (PMC3355084; doi:10.1371/journal.ppat.1002672), 2012-05-17
Supplement: ppat.1002672.s004.pdf [file ppat.1002672.s004.pdf]

**Table S2.** Plasmids used in the study

| Plasmid                   | Details                                                                                                                                                                                          | Source     |
|---------------------------|--------------------------------------------------------------------------------------------------------------------------------------------------------------------------------------------------|------------|
| pAJR32                    | Source of <i>sacBkan</i> cassette                                                                                                                                                                | [44]       |
| pBADmyc-HisA/pBAD18       | Arabinose inducible expression vectors                                                                                                                                                           | Invitrogen |
| pBR322 $\Delta$ Scal-SspI | pBR322 digested with <i>Scal</i> and <i>SspI</i> , then ligated. This removes part of the ampicillin resistance gene.                                                                            | This study |
| pBAD-N                    | Amplified with primers JTstx2.N.F. <i>NcoI</i> and JTstx2.N.R. <i>HindIII</i> from Sakai and cloned via <i>NcoI</i> and <i>HindIII</i> sites in pBAD18                                           | This study |
| pBAD-CRO                  | Amplified with primers JTstx2.CRO.F. <i>NcoI</i> and JTstx2.CRO.R. <i>HindIII</i> from Sakai and cloned via <i>NcoI</i> and <i>HindIII</i> sites in pBAD18                                       | This study |
| pBAD-CI                   | Amplified with primers JTstx2.CI.F. <i>NcoI</i> and JTstx2.CI.R. <i>HindIII</i> from Sakai and cloned via <i>NcoI</i> and <i>HindIII</i> sites in pBAD18                                         | This study |
| pBAD-CII                  | Amplified with primers JTstx2.CII.F. <i>NcoI</i> and JTstx2.CII.R. <i>HindIII</i> from Sakai and cloned via <i>NcoI</i> and <i>HindIII</i> sites in pBAD18                                       | This study |
| pBAD-Q                    | Amplified with primers JTstx2.ci.Q. <i>NcoI</i> and JTstx2.Q.R. <i>HindIII</i> from Sakai and cloned via <i>NcoI</i> and <i>HindIII</i> sites in pBAD18                                          | This study |
| pAJR70                    | pACYC184 containing <i>egfp</i>                                                                                                                                                                  | [44]       |
| pAJR71                    | LEE1 promoter fusion                                                                                                                                                                             | [44]       |
| pIB307                    | pMAK705-based vector for allelic exchange; temperature-sensitive replicon                                                                                                                        | [70]       |
| pWSK29                    | Cloning vector                                                                                                                                                                                   | [Ref 1*]   |
| pXLS01                    | <i>ler</i> with 567 bp of the promoter region was amplified with primer pair Ct- <i>ler</i> - <i>Sall</i> and Nt- <i>ler</i> - <i>PstI</i> , cloned into pWSK29 with <i>Sall</i> and <i>PstI</i> | This study |
| pXLS10                    | <i>z3357</i> ( <i>cll<sub>stx1</sub></i> ) flanking regions amplified from EDL933 and cloned into pIB307 as described in Material and Methods (used to make ZAP1325)                             | This study |
| pXLS11                    | <i>z1449</i> ( <i>cll<sub>stx2</sub></i> ) flanking regions from EDL933 cloned into pIB307 as described in Material and Methods (used to make ZAP1323 & pXLS13)                                  | This study |
| pXLS12                    | Stx1 phage (CP-933V) flanking regions from EDL933 cloned into pIB307 as described in Material and Methods (used to make pXLS16)                                                                  | This study |
| pXLS13                    | <i>z1449</i> ( <i>cll<sub>stx2</sub></i> ) flanking regions from EDL933 cloned into pIB307 with <i>sacBkan</i> cassette (used to make ZAP1321)                                                   | This study |
| pXLS14                    | <i>z3357</i> ( <i>cll<sub>stx1</sub></i> ) flanking regions from EDL933 cloned into pIB307 with <i>sacBkan</i> cassette (used to make ZAP1324)                                                   | This study |
| pXLS15                    | Stx2 phage (BP-933W) flanking regions from EDL933 cloned into pIB307 as described above in Material and Methods (used to make ZAP1322)                                                           | This study |
| pXLS16                    | Stx1 phage (CP-933V) flanking regions from EDL933 cloned into pIB307 with <i>sacBkan</i> cassette (used to make ZAP1326)                                                                         | This study |
| pKC26                     | GFP+ vector for constructing transcriptional fusions                                                                                                                                             | [14]       |
| pP <i>gadE</i> .GFP+      | GFP+ transcriptional fusion to the <i>gadE</i> promoter                                                                                                                                          | [14]       |

Ref 1\* Wang RF, Kushner SR (1991) Construction of versatile low-copy number vectors for cloning, sequencing and gene expression in *Escherichia coli*. Gene 100: 195-9.
