# Supplementary material for: Lysogeny with Shiga Toxin 2-Encoding Bacteriophages Represses Type III Secretion in Enterohemorrhagic Escherichia coli
Source: PLOS journal article supplement (doi:10.1371/journal.ppat.1002672), 2012-05-17

Figure S2

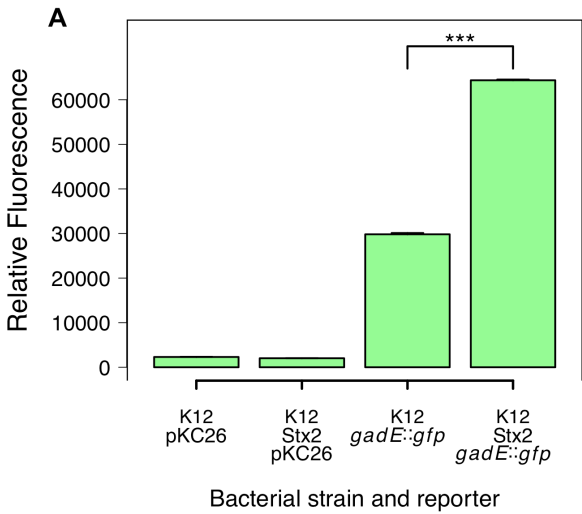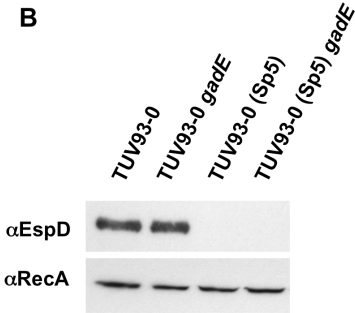

Supplement: S2 (10.1371/journal.ppat.1002672.s002) [file journal.ppat.1002672.s002]
